# Supplementary material for: Energetic and topological insights into the supramolecular structure of dicationic ionic liquids
Source: Royal Society of Chemistry journal article supplement (doi:10.1039/c5ce00073d), 2015-01-01
Supplement: c5ce00073d1.pdf [file c5ce00073d1.pdf]

## Supporting Information

The interactions are demonstrated in the **Figure S1 (a) and (b)**, anions and water molecules were only demonstrated for a central cationic moiety in order to facilitate the visualization of interactions in [DBMIM][2Br]•[2H<sub>2</sub>O].

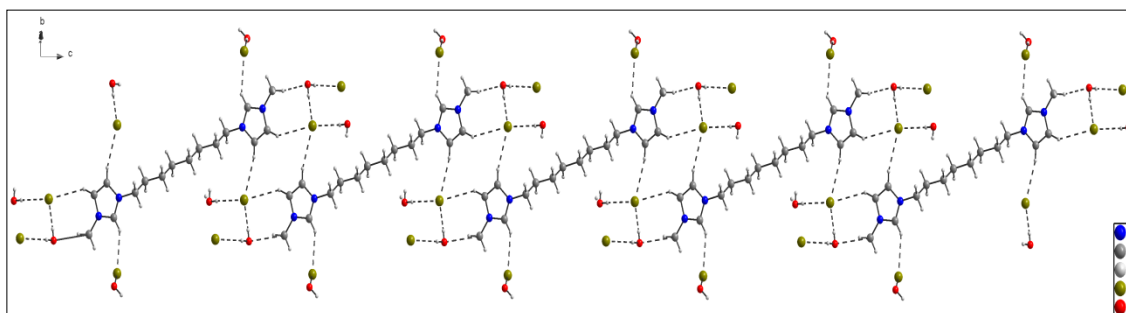

**Figure S1.** Interactions among water, bromide and imidazolium ring in the crystalline structure of [DBMIM][2Br]•[2H<sub>2</sub>O] performed by Diamond Crystal and Molecular Structure visualization.<sup>1</sup>

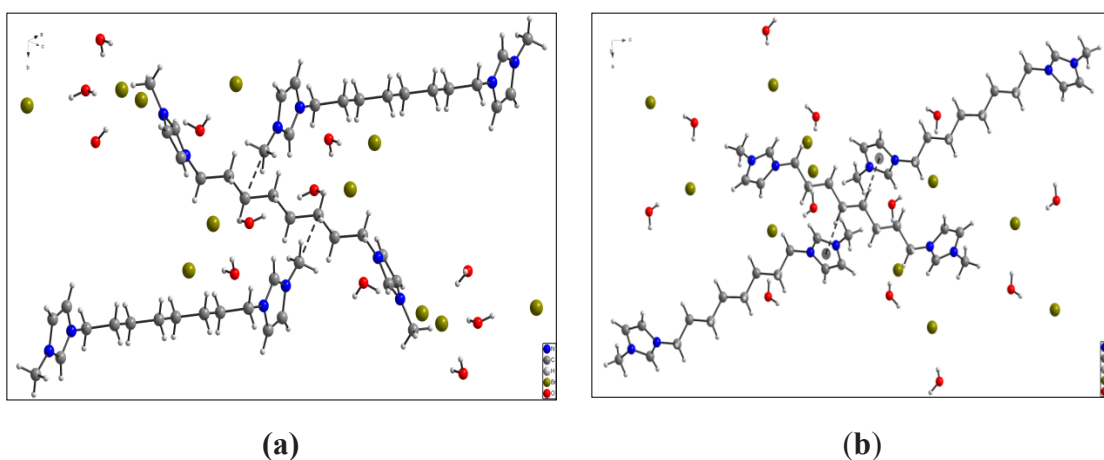

**Figure S2.** (a) C-H interactions between two cationic moieties and (b) C-H... $\pi$  interactions between two cationic moieties performed by Diamond Crystal and Molecular Structure visualization.<sup>1</sup>

In the **Figure S3(a)** is showed the PVD of dication and at **Figure S3(b)** is showed the PVD of each anion that are around the dication for [DBMIM][2BF<sub>4</sub>]. The **Figure S4** demonstrates the contact surface of dication and a specific anion.

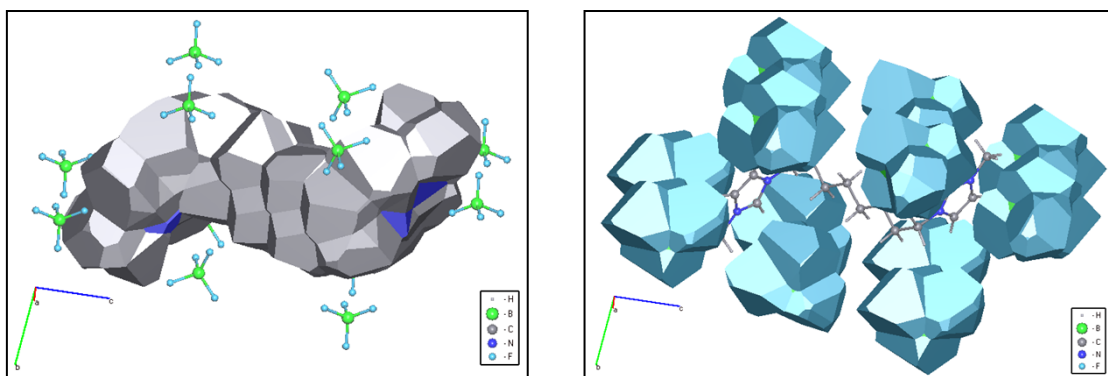

**Figure S3.** (a) VDP for cation of [DBMIM][2BF<sub>4</sub>]. (b) VDP for anions of IL [DBMIM][2BF<sub>4</sub>] by TOPOS. <sup>2</sup>

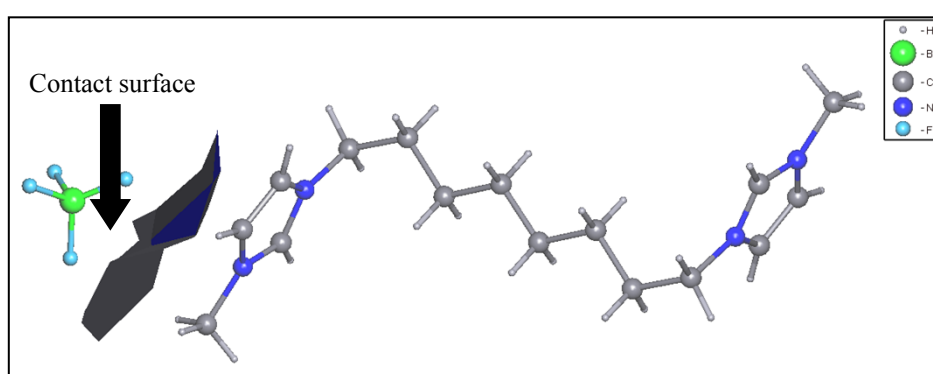

**Figure S4.** Examples of contact surfaces between dication and anion of IL [DBMIM][2BF<sub>4</sub>].<sup>2</sup>

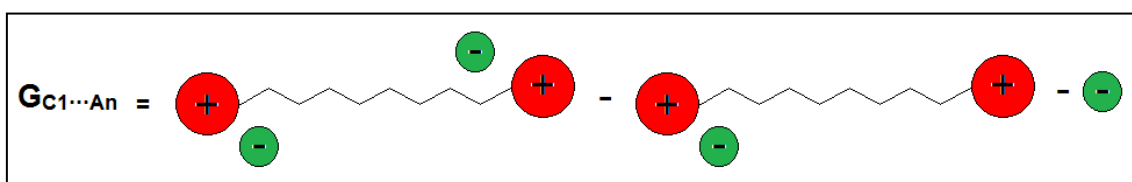

**Figure S5** (a) shows schematic representation of calculation to  $G_{C1...An}$  for cation/anion interaction in [DBMIM][2BF<sub>4</sub>] and/or [DBMIM][2Br]•[2H<sub>2</sub>O].

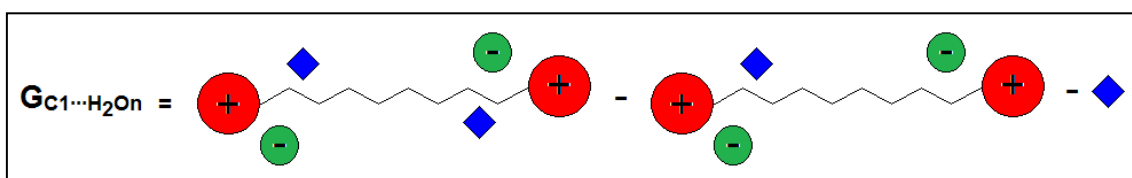

**Figure S5.** (b) Schematic representation of calculation to energy for water interactions with [DBMIM][2Br]•[2H<sub>2</sub>O].

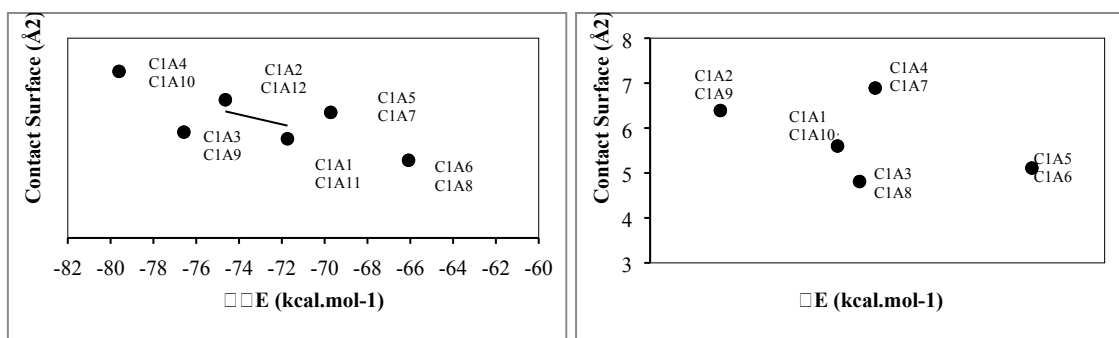

**Figure S6.** Graphic that demonstrate the interaction energy *versus* surface area in: **(a)** [DBMIM][2BF<sub>4</sub>]. Eq.  $y = -0.6163x - 30.158$ ;  $r = 0.77$ . **(b)** [DBMIM][2Br]•[2H<sub>2</sub>O]. Eq.  $y = -0.0544x + 1.6314$ ;  $r = 0.46$ .

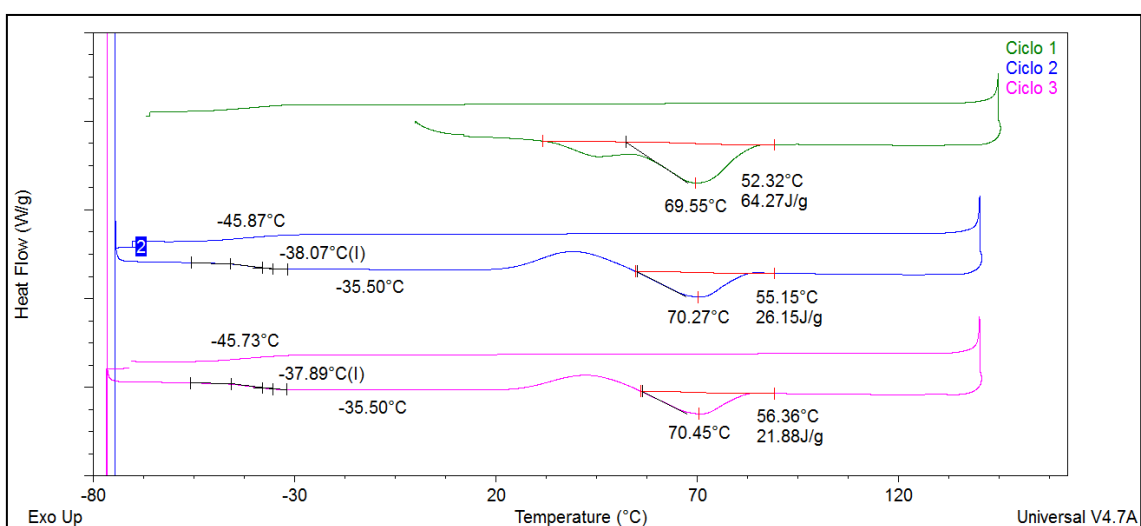

**Figure S7.** Thermogram of [DBMIM][2BF<sub>4</sub>] obtained by DSC.

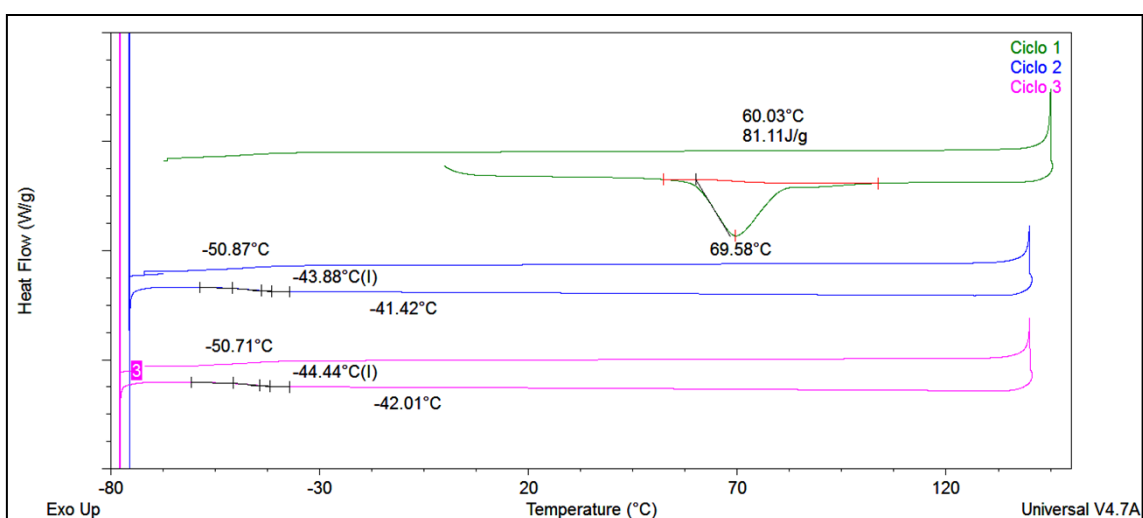

**Figure S8.** Thermogram of [DBMIM][2Br]•[H<sub>2</sub>O] obtained by DSC.

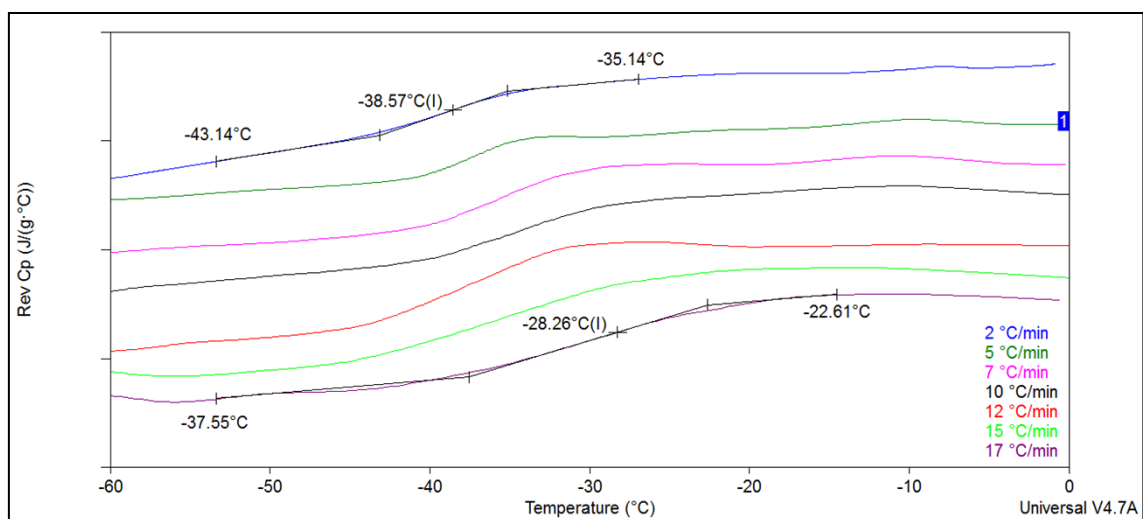

**Figure S9.** Analysis of amorphous percent by DSC for [DBMIM][2BF<sub>4</sub>].

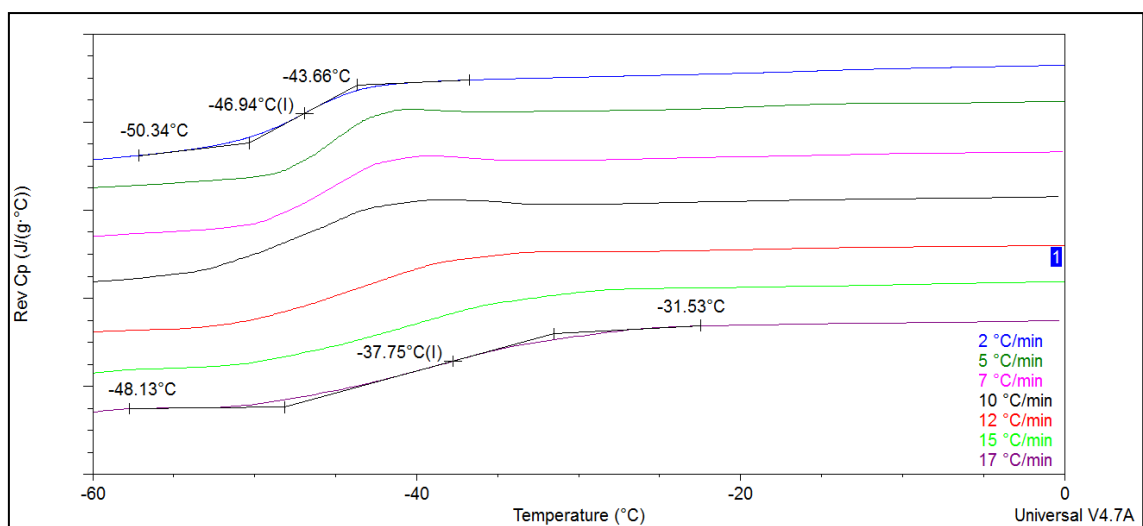

**Figure S10.** Analysis of amorphous percent by DSC for [DBMIM][2Br]•[H<sub>2</sub>O].

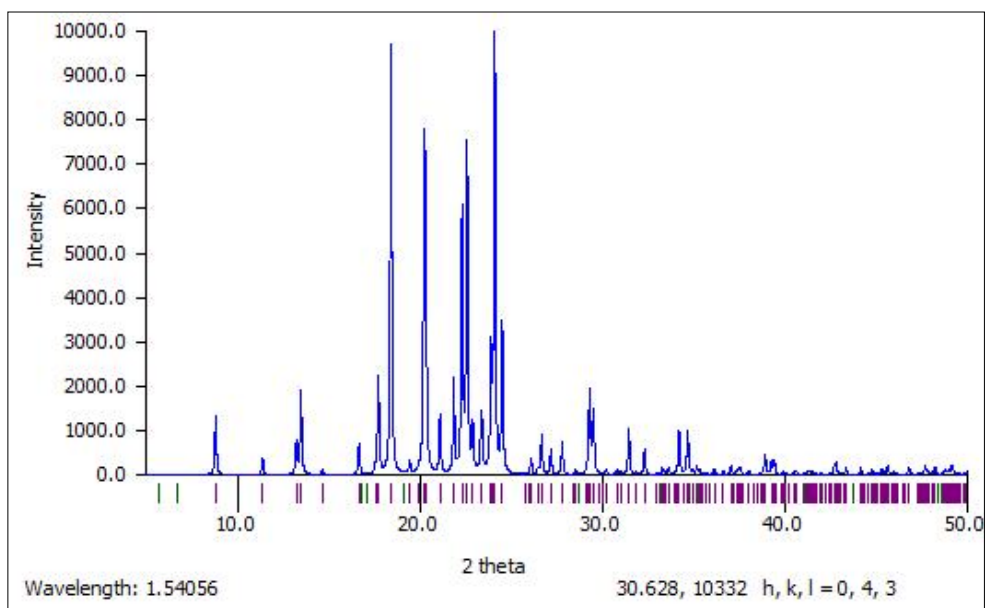

**Figure S11.** Simulated x-ray powder diffraction of [DBMIM][2BF<sub>4</sub>].

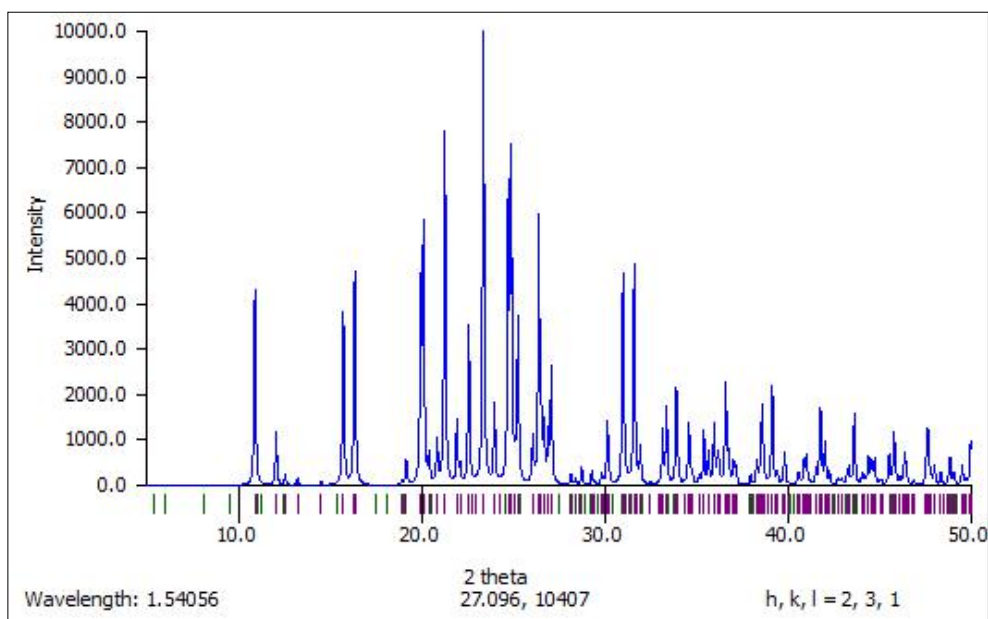

**Figure S12.** Simulated x-ray powder diffraction of [DBMIM][2Br]•[2H<sub>2</sub>O].

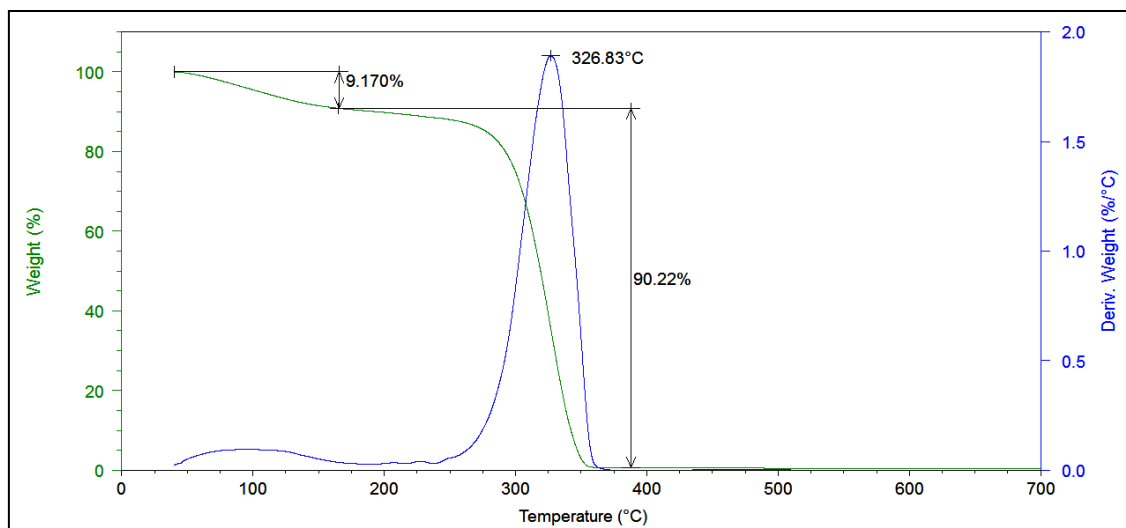

**Figure S13.** Thermogravimetric analysis of [DBMIM][2Br]•[H<sub>2</sub>O].

## REFERENCES

- [1] Dr. Putz, H., Dr. Brandenburg GbR, K., “Diamond - Crystal and Molecular Structure Visualization Crystal Impact.” Bonn, Germany, <http://www.crystalimpact.com/diamond>.
- [2] A. P. Blatov, V. A., Shevchenko, “TOPOS® version 4.0 software.” Samara State University, Samara, Russia, <http://www.topos.ssu.samara.ru>.
